# Supplementary material
Source: PubMed Central journal article supplement (PMC6109965)
Supplement: NIHMS978899-supplement-1.pdf [file NIHMS978899-supplement-1.pdf]

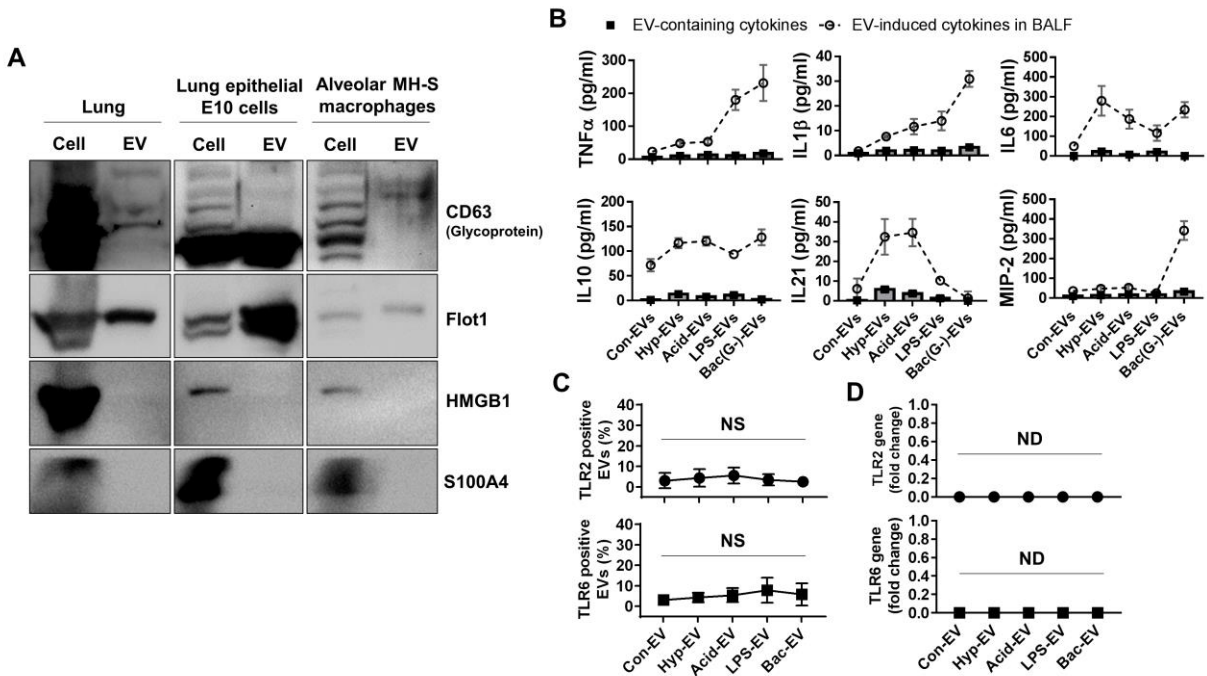

**Supplementary figure 1. Characterization of isolated EVs.** (A) EVs were isolated from mouse BALF, lung epithelial E10 cells, and alveolar MH-S macrophages. The purify of isolated EVs were verified using western blotting with indicated antibodies (representative data, n = 2). (B-D) BALF-EVs were isolated after exposure of ALI stimuli, including hyperoxia, acid, LPS or *P. pneumoniae* (G-). The EV-containing cytokine levels were measured using ELISA (B). The TLR expressions (C) and mRNA levels (D) in the purified EVs were analyzed using FACS and qPCR, respectively. (mean  $\pm$  SD, n = 3 per group).
